# Supplementary material
Source: PubMed Central journal article supplement (PMC3789357)

## Supplementary Figure

**Figure S1:** Infradian variation of FGF-23 levels depicted on a logarithmic scale. Blood samples to measure C-terminal FGF-23 levels were obtained from eleven former study participants before three dialysis sessions (day 1: week`s first session, day 2: week`s second session, day 3: week`s last session) from a single week in March 2013.

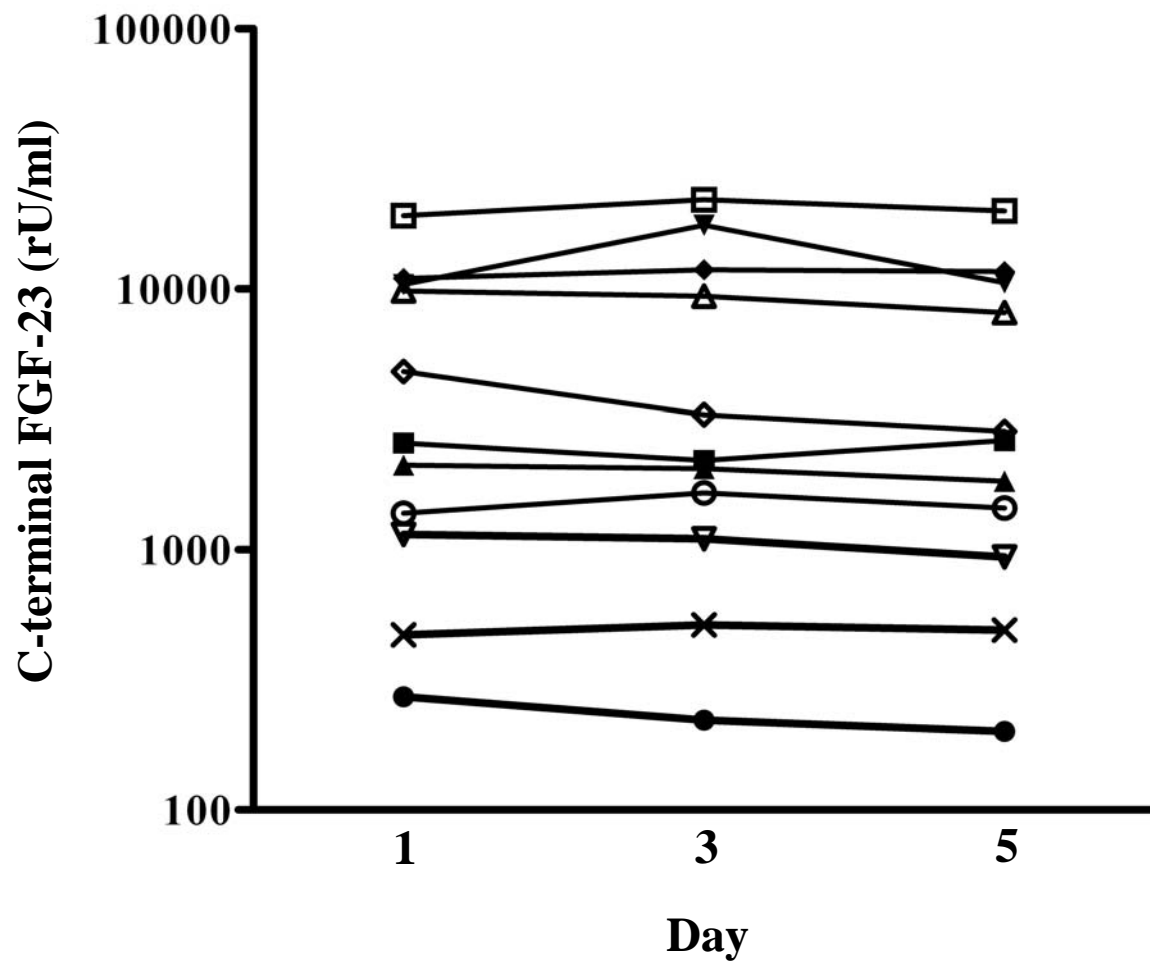

Supplement: CJN.13021212_CJN13021212SupplementaryData.pdf [file CJN.13021212_CJN13021212SupplementaryData.pdf]
